# Supplementary material for: Low HIV incidence in pregnant and postpartum women receiving a community-based combination HIV prevention intervention in a high HIV incidence setting in South Africa
Source: PubMed Central journal article supplement (PMC5531482; doi:10.1371/journal.pone.0181691), 2017-07-27

# Supplemental Digital Content 1: Flow chart of women included and excluded from analyses

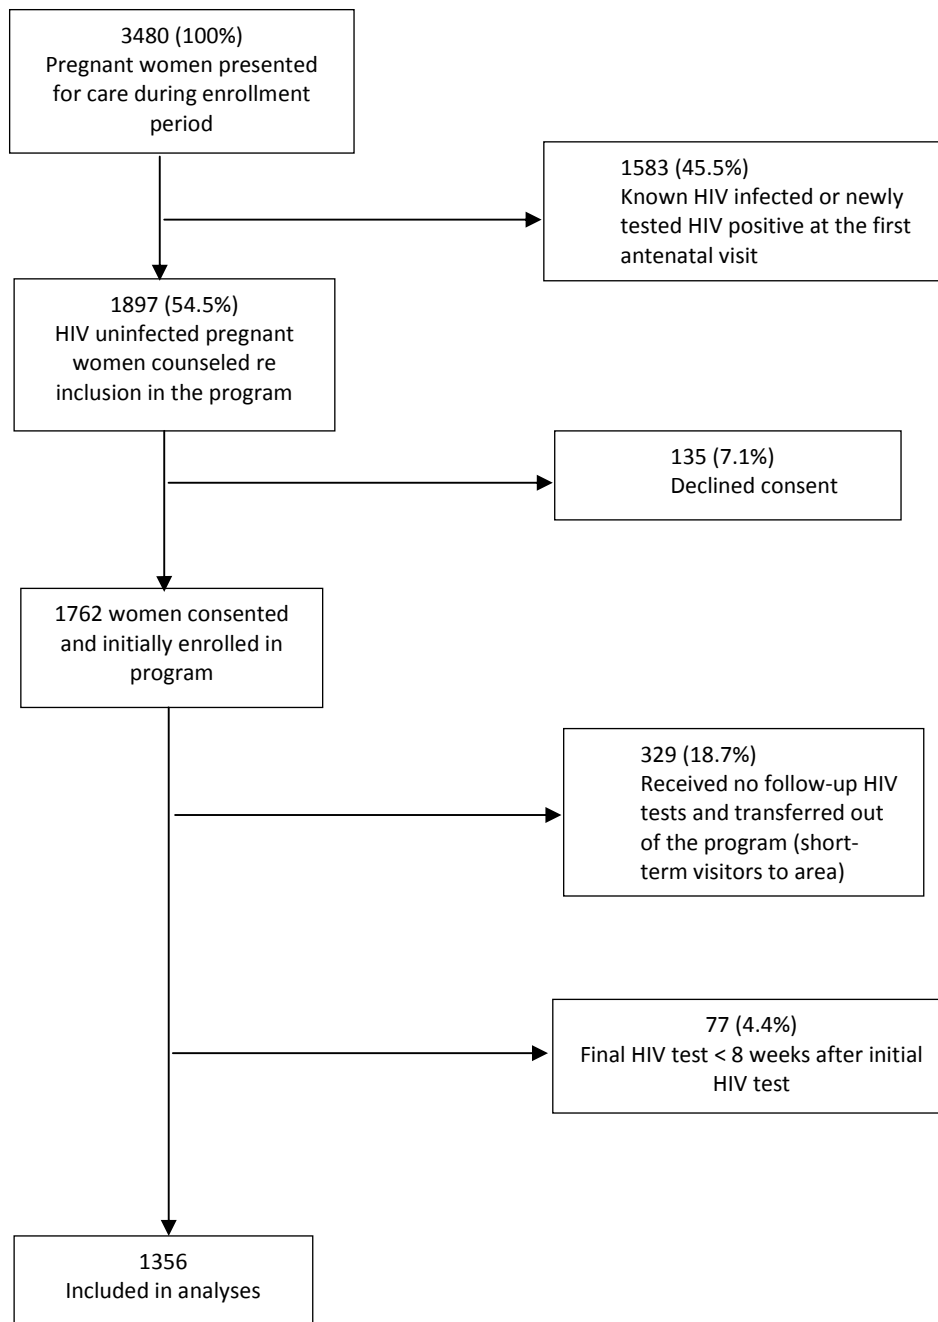

Supplement: pone.0181691.s001.pdf [file pone.0181691.s001.pdf]
